# Supplementary material for: Promoting perovskite crystal growth to achieve highly efficient and stable solar cells by introducing acetamide as an additive
Source: Royal Society of Chemistry journal article supplement (doi:10.1039/c8ta02121j), 2018-01-01
Supplement: c8ta02121j1.pdf [file c8ta02121j1.pdf]

## Supplementary Information

### **Promoting the perovskite crystal growth to achieve highly efficient and stable solar cells by introducing acetamide additive**

Haiying Zheng,<sup>ab</sup> Liangzheng Zhu,<sup>ab</sup> Linhua Hu,<sup>a</sup> Shangfeng Yang,<sup>b</sup> Shuanghong Chen,<sup>a</sup> Ahmed  
Alsaedi,<sup>c</sup> Tasawar Hayat,<sup>ce</sup> Yang Huang,<sup>\*a</sup> Xu Pan<sup>\*a</sup> and Songyuan Dai<sup>\*acd</sup>

<sup>a</sup>Key Laboratory of Photovoltaic and Energy Conservation Materials, Institute of Applied Technology, Hefei  
Institutes of Physical Science, Chinese Academy of Sciences, Hefei 230031, China.

<sup>b</sup>University of Science and Technology of China, Hefei 230026, China.

<sup>c</sup>NAAM Research Group, Department of Mathematics, Faculty of Science, King Abdulaziz University, Jeddah  
21589, Saudi Arabia.

<sup>d</sup>State Key Laboratory of Alternate Electrical Power System with Renewable Energy Sources, North China  
Electric Power University, Beijing 102206, China.

<sup>e</sup>Department of Mathematics, Quaid-I-Azam University, Islamabad 44000, Pakistan.

\*Email: xpan@rntek.cas.cn

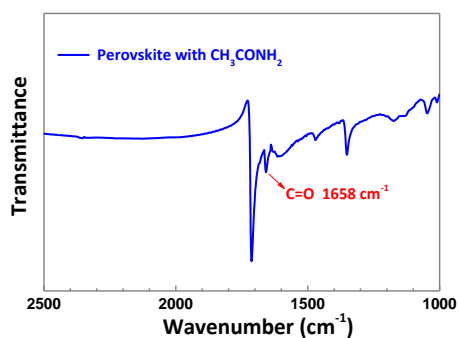

**Fig. S1.** Partial enlargement of fourier transform infrared (FTIR) spectra of perovskite powder with  $\text{CH}_3\text{CONH}_2$ .

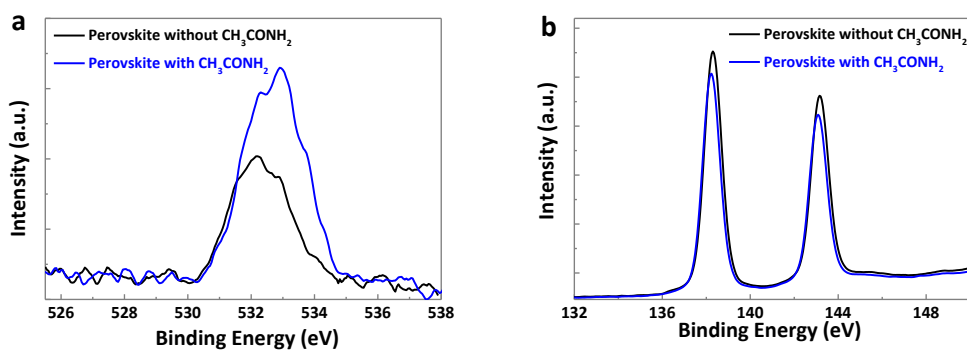

**Fig. S2.** X-ray photoelectron spectroscopy (XPS) of O 1s (a) and Pb 4f (b) of perovskite films with (5 mg/mL) and without  $\text{CH}_3\text{CONH}_2$ .

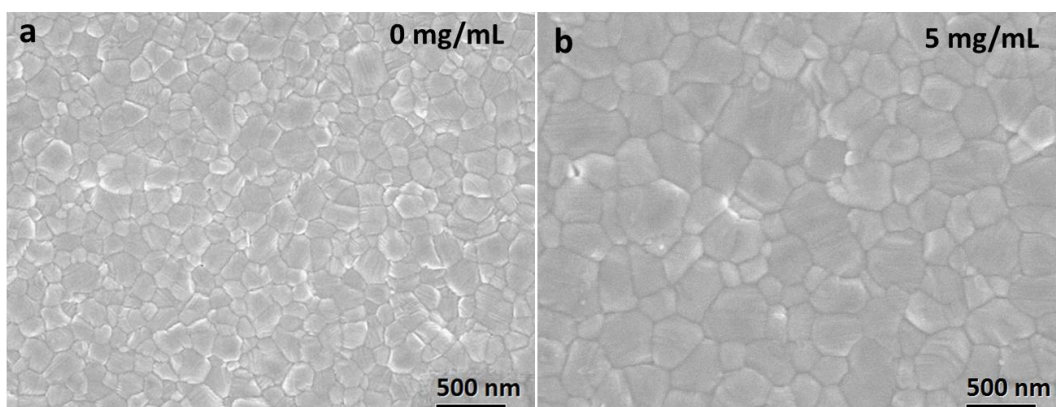

**Fig. S3.** Top view SEM images of perovskite films (b) with and (a) without  $\text{CH}_3\text{CONH}_2$ .

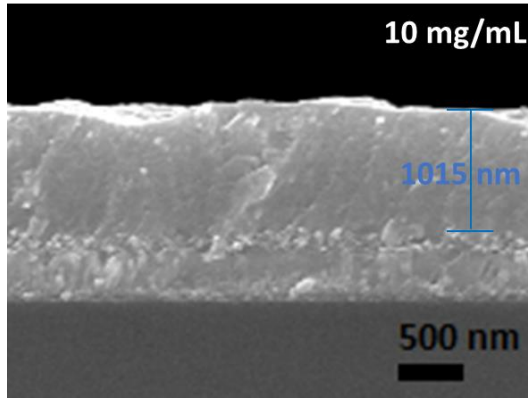

**Fig. S4.** cross-sectional SEM images of perovskite films with 10 mg/mL  $\text{CH}_3\text{CONH}_2$ .

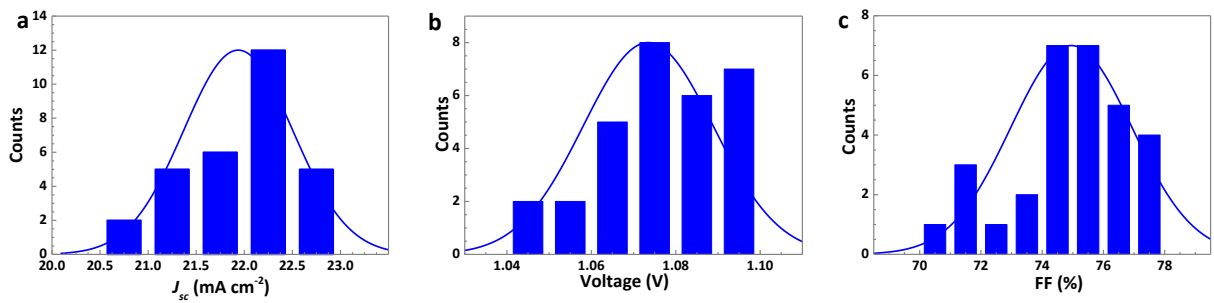

**Fig. S5.** (a) Short-circuit current density ( $J_{sc}$ ), (b) open circuit voltages ( $V_{oc}$ ) and (c) fill factor (FF) histogram fitted with a Gaussian distribution of the devices with 5 mg/mL  $\text{CH}_3\text{CONH}_2$  over 30 measured devices.

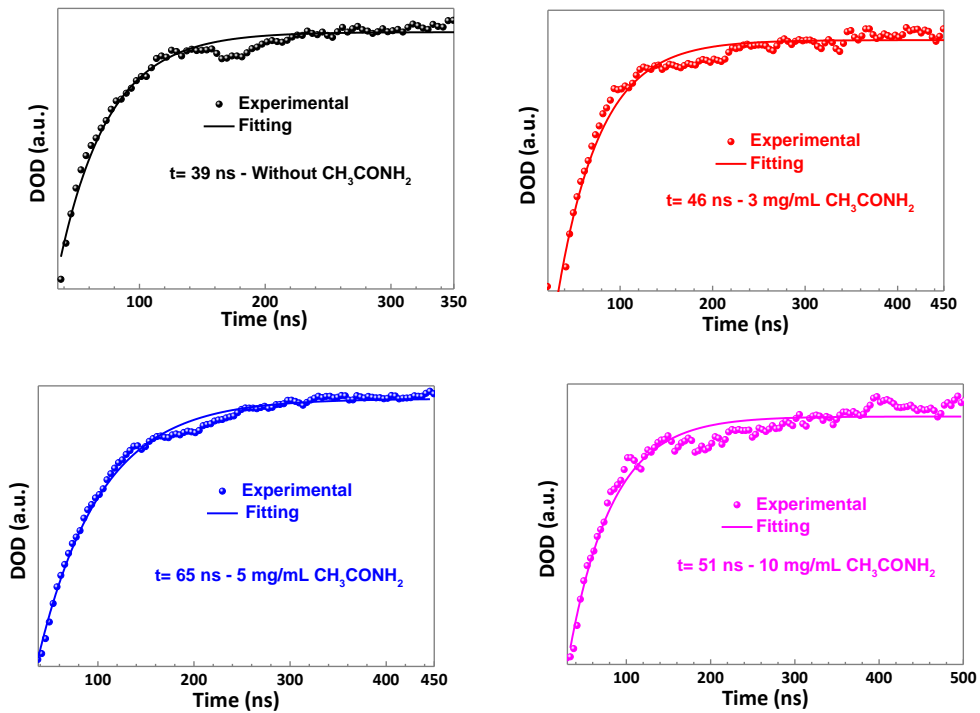

**Fig. S6.** Normalized TA responses of perovskite films with varied ratios of  $\text{CH}_3\text{CONH}_2$  (0, 3, 5, 10 mg/mL).

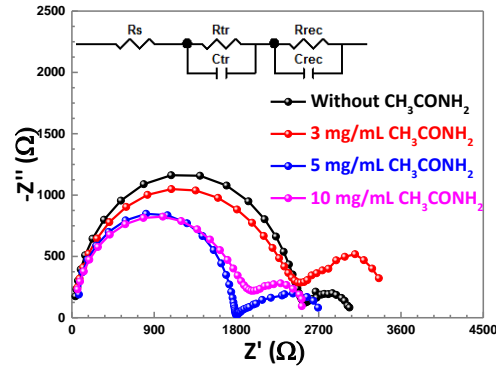

**Fig. S7.** Nyquist plots of perovskite devices with varied ratios of  $\text{CH}_3\text{CONH}_2$  (0, 3, 5, 10 mg/mL) at  $V=0.9$  V.

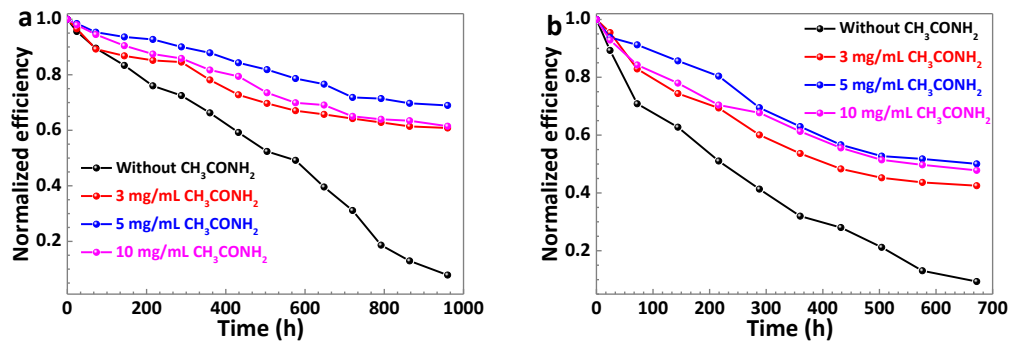

**Fig. S8.** Normalized efficiency variation curves of unsealed perovskite devices with varied ratios of  $\text{CH}_3\text{CONH}_2$  (0, 3, 5, 10 mg/mL) under (a) 50% and (b) 80% RH.

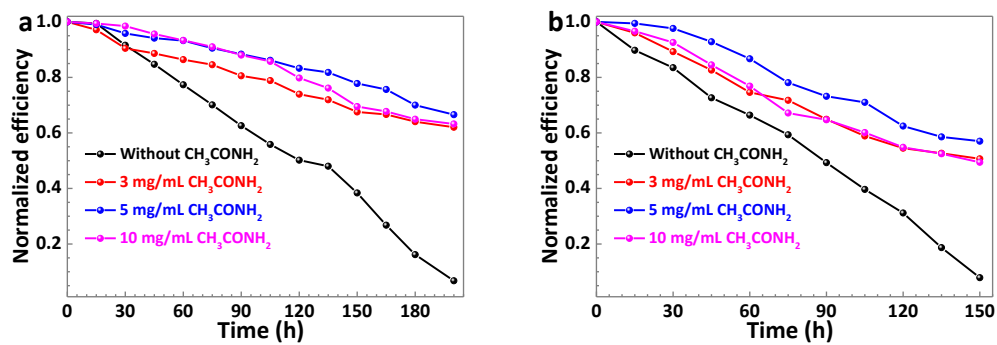

**Fig. S9.** Normalized efficiency variation curves of unsealed perovskite devices with varied ratios of

CH<sub>3</sub>CONH<sub>2</sub> (0, 3, 5, 10 mg/mL) at (a) 60 °C and (b) 85 °C.

**Table S1.** Photovoltaic parameters of perovskite devices with varied ratios of CH<sub>3</sub>CONH<sub>2</sub> (0, 3, 5, 10, 15 and 20 mg/mL).

| Device   | $J_{sc}$ (mA cm <sup>-2</sup> ) | $V_{oc}$ (V) | FF (%) | PCE (%) |
|----------|---------------------------------|--------------|--------|---------|
| 0 mg/mL  | 21.91                           | 1.02         | 73.56  | 16.44   |
| 3 mg/mL  | 22.64                           | 1.09         | 75.46  | 18.62   |
| 5 mg/mL  | 22.89                           | 1.09         | 76.19  | 19.01   |
| 10 mg/mL | 22.41                           | 1.09         | 73.05  | 17.84   |
| 15 mg/mL | 20.43                           | 1.02         | 67.44  | 14.05   |
| 20 mg/mL | 18.52                           | 0.98         | 66.39  | 12.08   |

**Table S2.** Photovoltaic parameters of perovskite devices with (5 mg/mL) and without CH<sub>3</sub>CONH<sub>2</sub> under reverse and forward scan directions.

| Device          | $J_{sc}$ (mA cm <sup>-2</sup> ) | $V_{oc}$ (V) | FF (%) | PCE (%) |
|-----------------|---------------------------------|--------------|--------|---------|
| Without-Reverse | 21.91                           | 1.02         | 73.56  | 16.44   |
| Without-Forward | 19.19                           | 1.02         | 75.77  | 14.83   |
| With-Reverse    | 22.89                           | 1.09         | 76.19  | 19.01   |
| With-Forward    | 22.84                           | 1.09         | 74.38  | 18.52   |
